# Supplementary material for: Karyotypic Evolution of Sauropsid Vertebrates Illuminated by Optical and Physical Mapping of the Painted Turtle and Slider Turtle Genomes
Source: MDPI journal article supplement (doi:10.3390/genes11080928), 2020-08-12
Supplement: s1 [file s1]

## SUPPLEMENTARY MATERIAL

# Karyotypic Evolution of Sauropsid Vertebrates Illuminated by Optical and Physical Mapping of the Painted Turtle and Slider Turtle Genomes

Lee et al. *Genes* 2020, 11, 928; doi:10.3390/genes11080928

**Figure S1:** Relative size of chromosomal scaffolds from the genome assembly of *Trachemys scripta elegans* (A), and alignment of painted turtle CPI 3.0.4 BioNano assembly scaffolds with known and unknown chromosomal location to the *T. s. elegans* genome assembly (B). CPI scaffolds map to almost all of the regions of the TSE genome assembly, revealing a comparable coverage of the CPI and TSE genome assemblies despite the lower contiguity of the CPI assembly.

**Figure S2:** Enlarged circos plots showing chromosomal homology and syteny blocks identified between *C. picta* turtle (CPI) and selected sauropsid genomes. Colored blocks represent *C. picta* turtle scaffolds within an individual chromosome. Black and grey blocks represent individual chromosome in the each sauropsid vertebrate. CPI = *Chrysemis picta*, TSE = *Trachemys scripta elegans*, GEV = *Gopherus evgoodei*, DCO = *Dermochelys coriacea*, ACA = *Anolis carolinensis*, LAG = *Lacerta agilis*, TEL = *Thamnophis elegans*, GGA = *Gallus gallus*.

**Table S1:** BACs previously mapped to CPI 3.0.3 and the corresponding hybrid scaffold that contains their sequence in the improved BioNano assembly (CPI 3.0.4).

**Table S2:** Number of genes sequences mapped bioinformatically (*in silico*) to BioNano assembly (CPI 3.0.4) and physically anchored to *C. picta* chromosomes via FISH.

**Supplementary Script 1:** Custom R script for BAC mapping to genome scaffolds.

Figure S1:

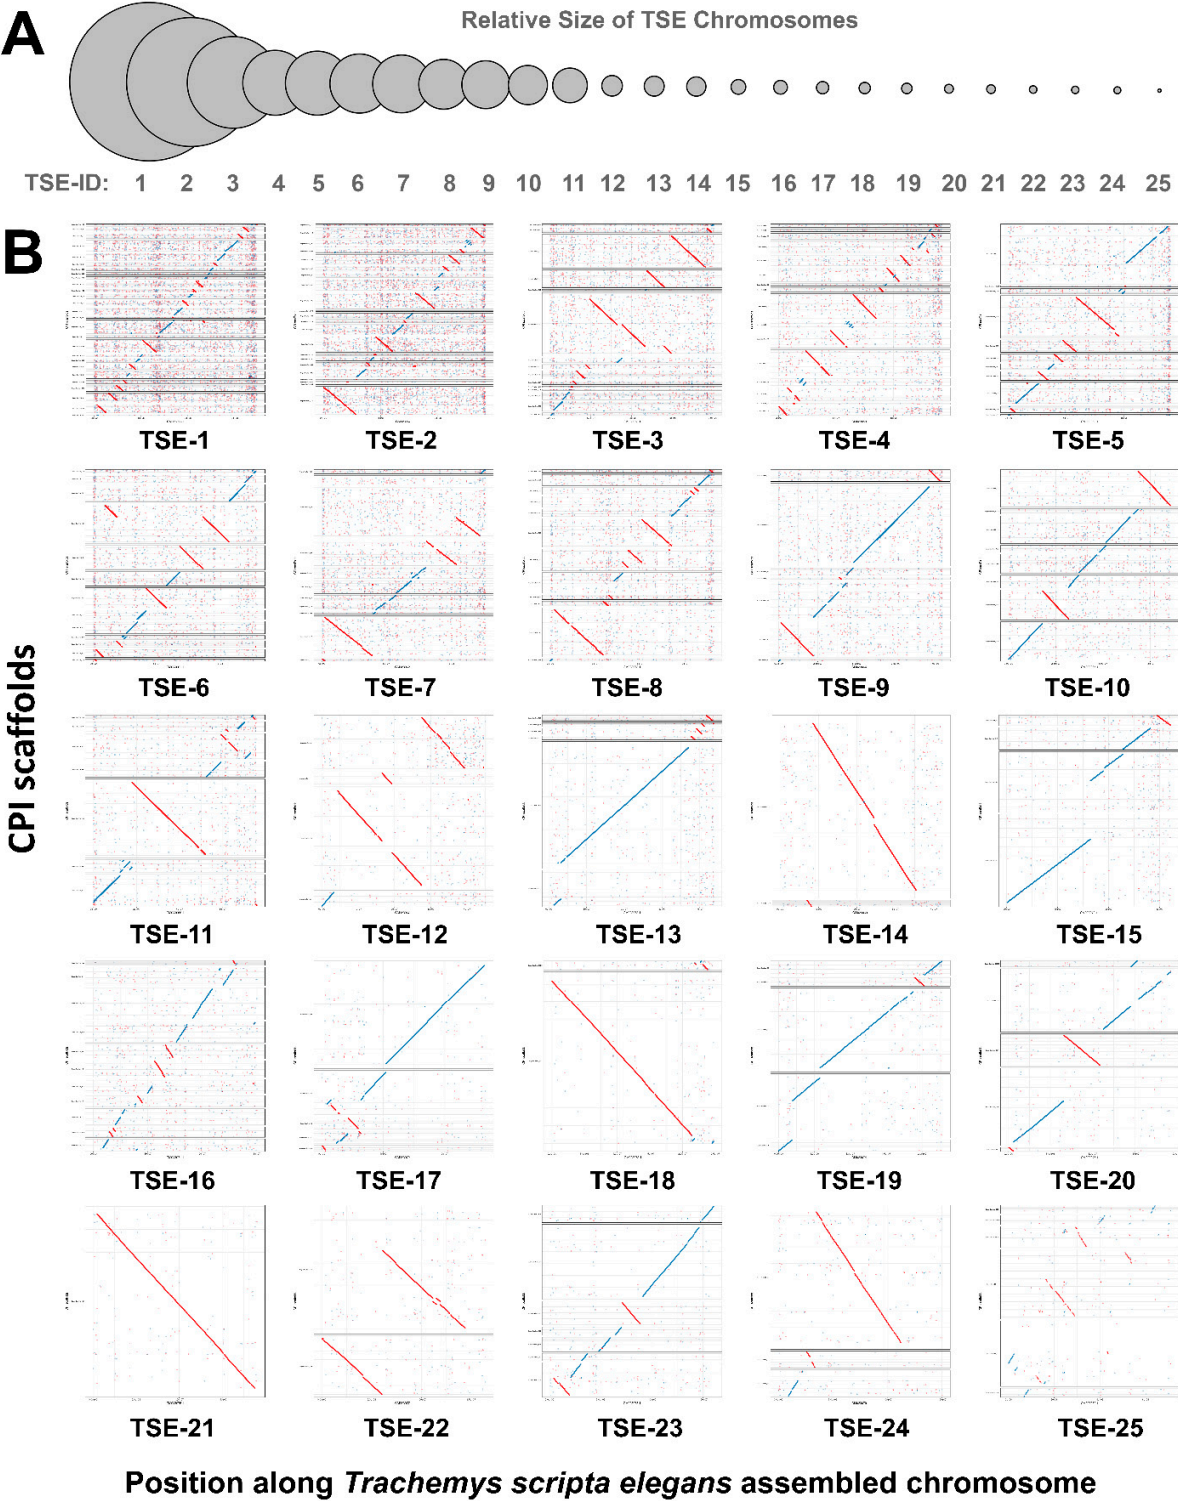

Figure S2.A-

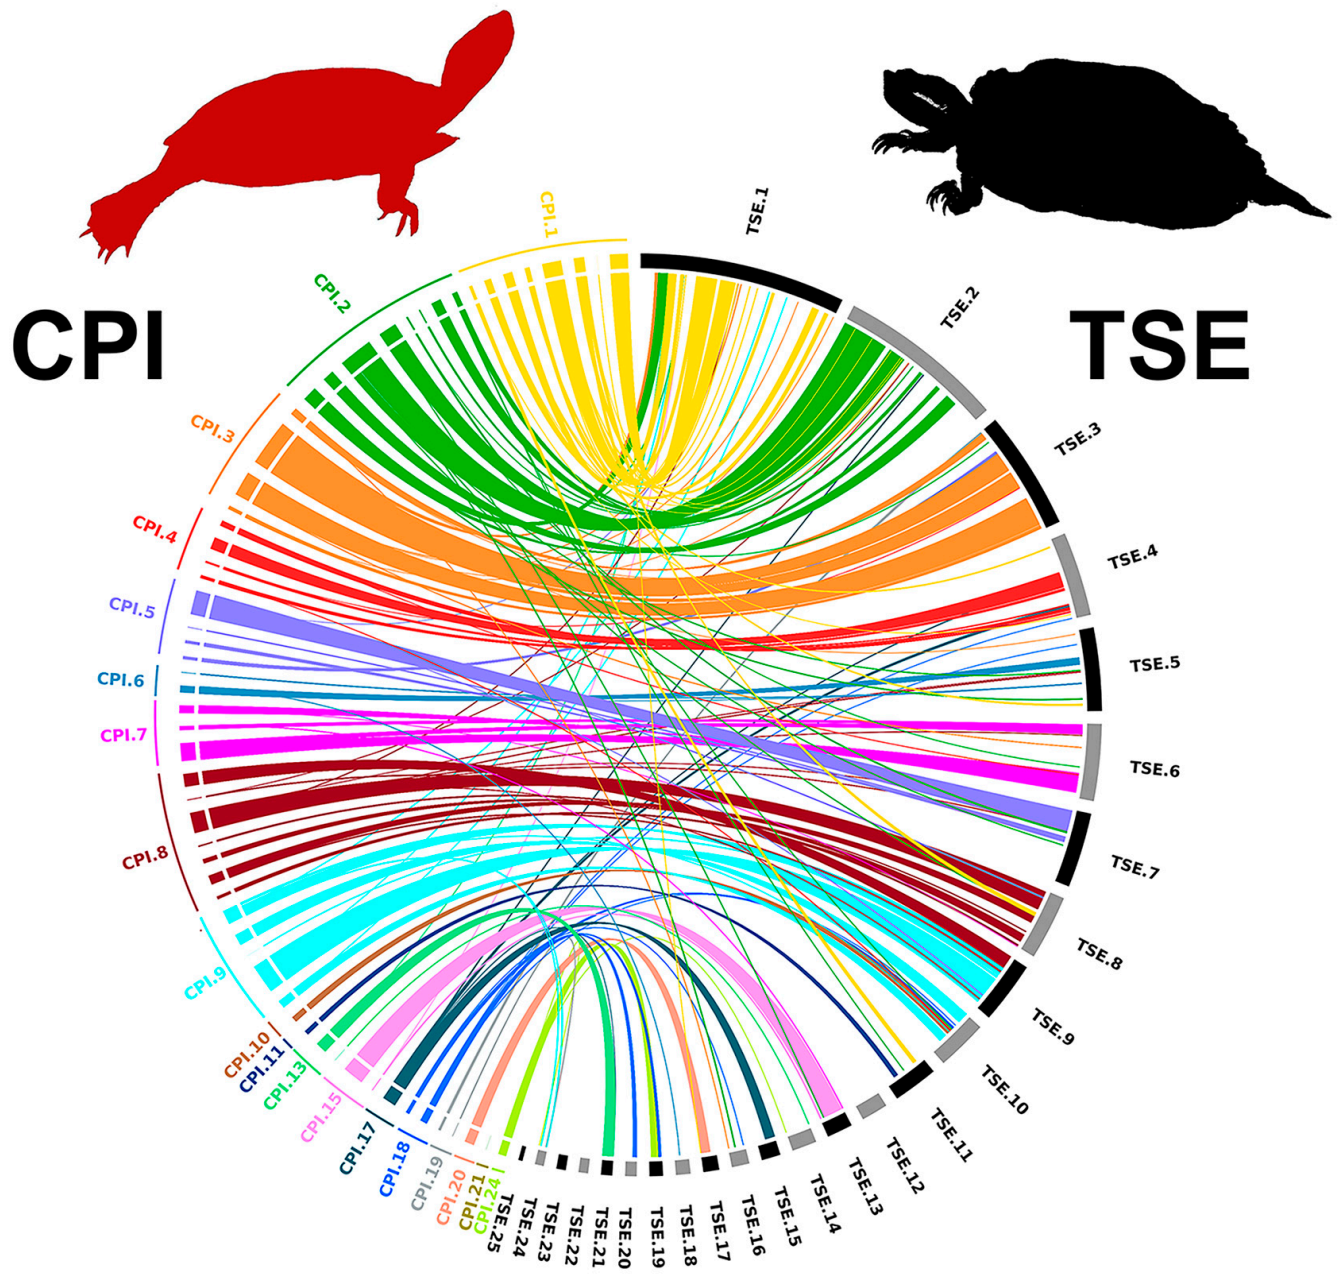

Figure S2.B

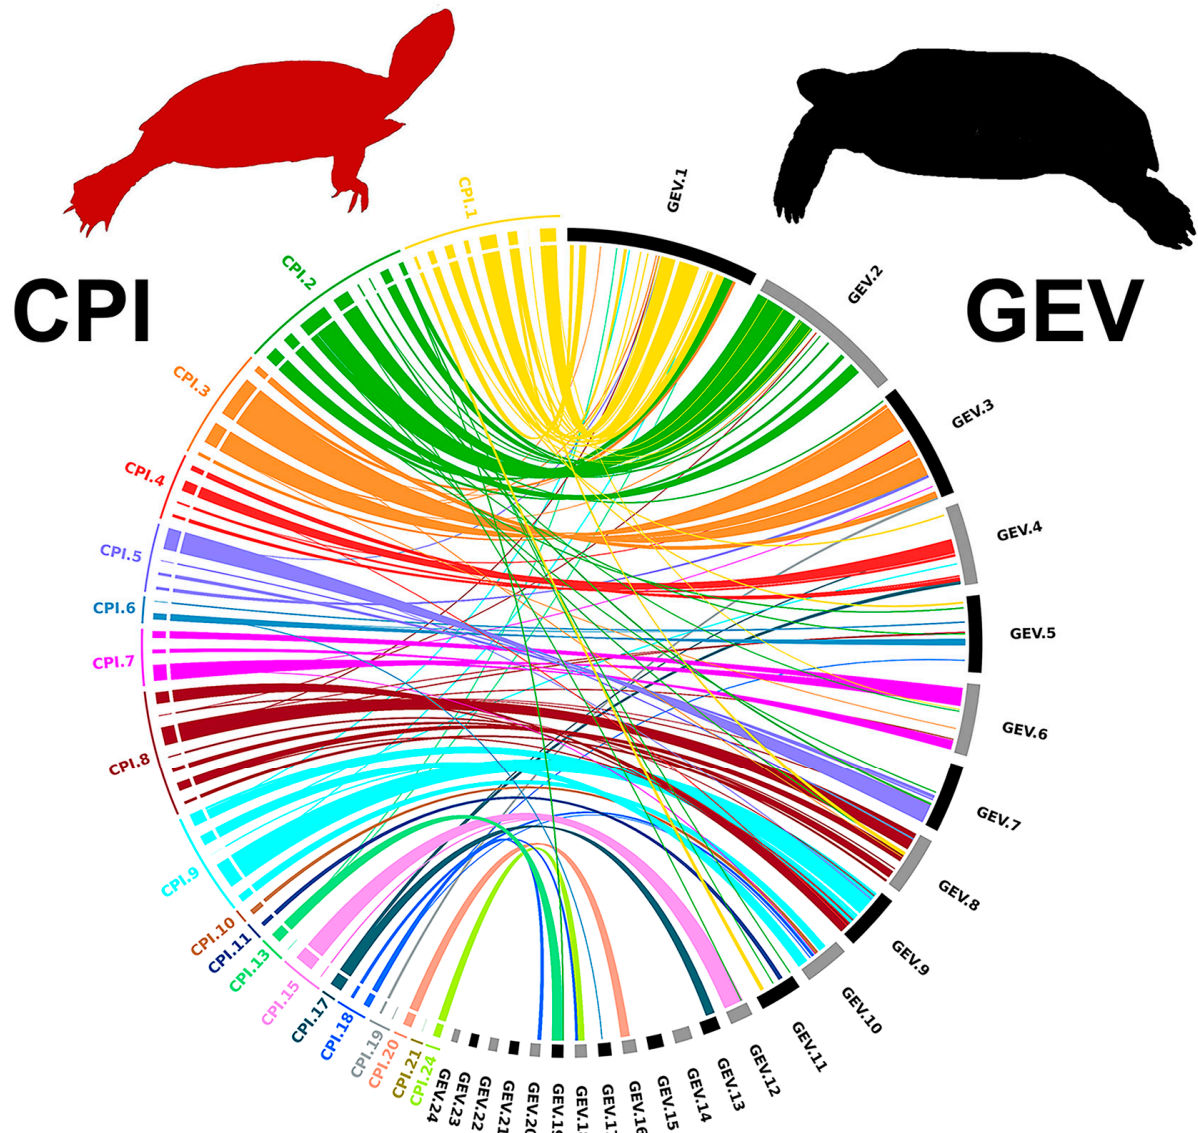



Figure S2.C

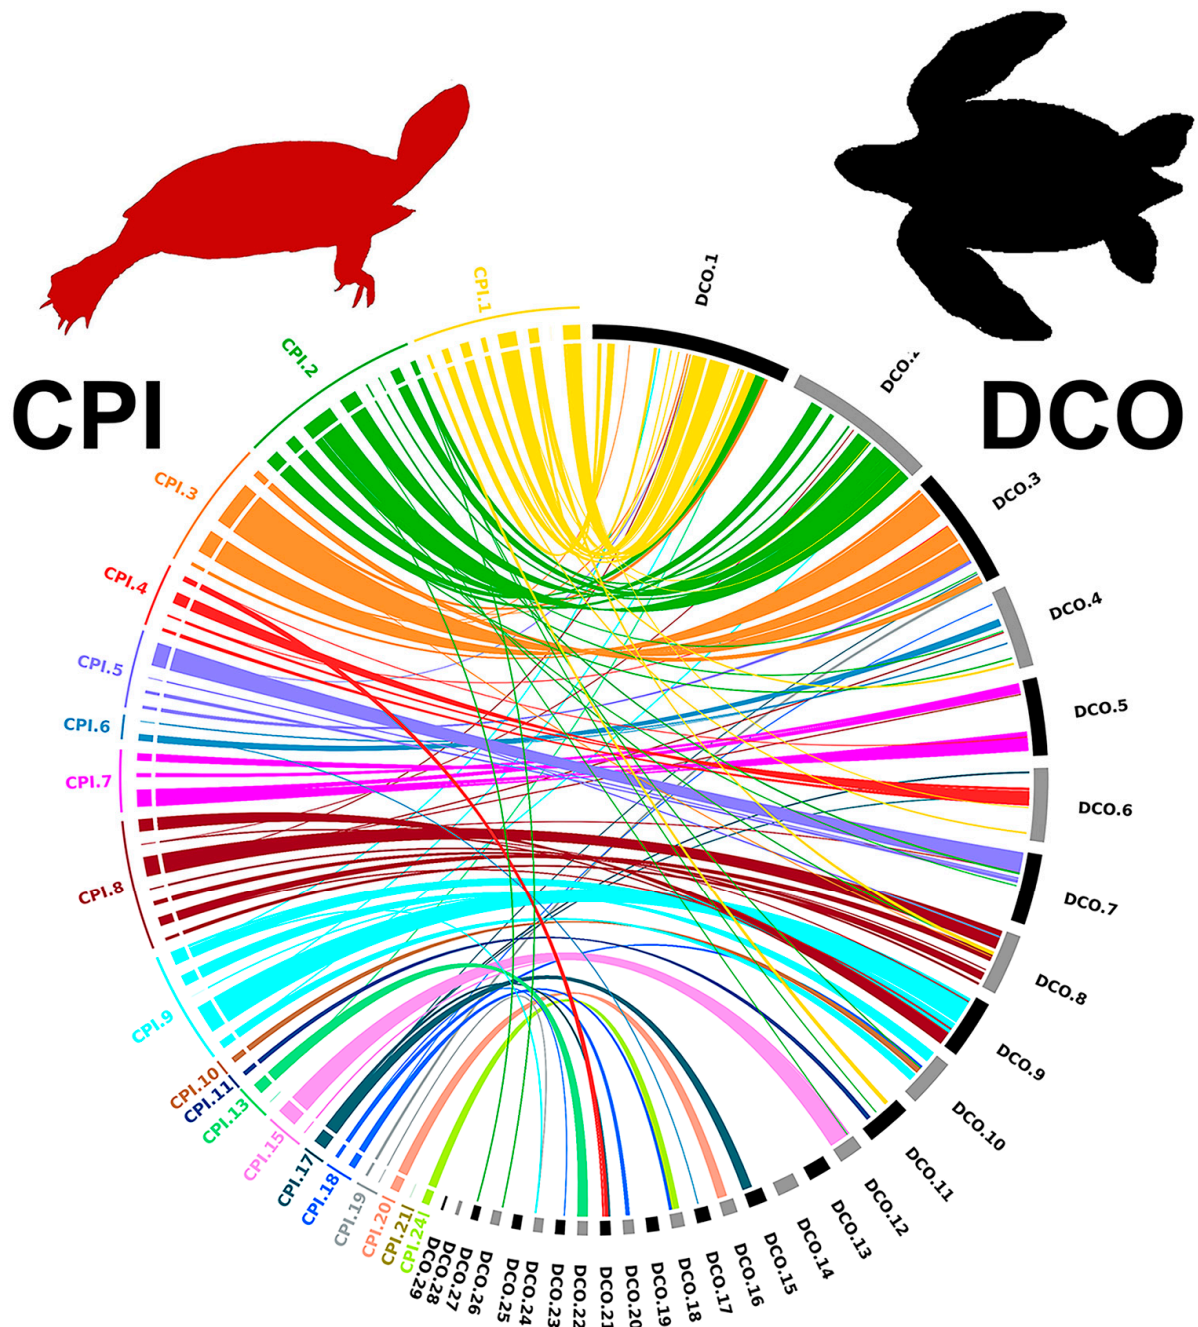

Figure S2.D

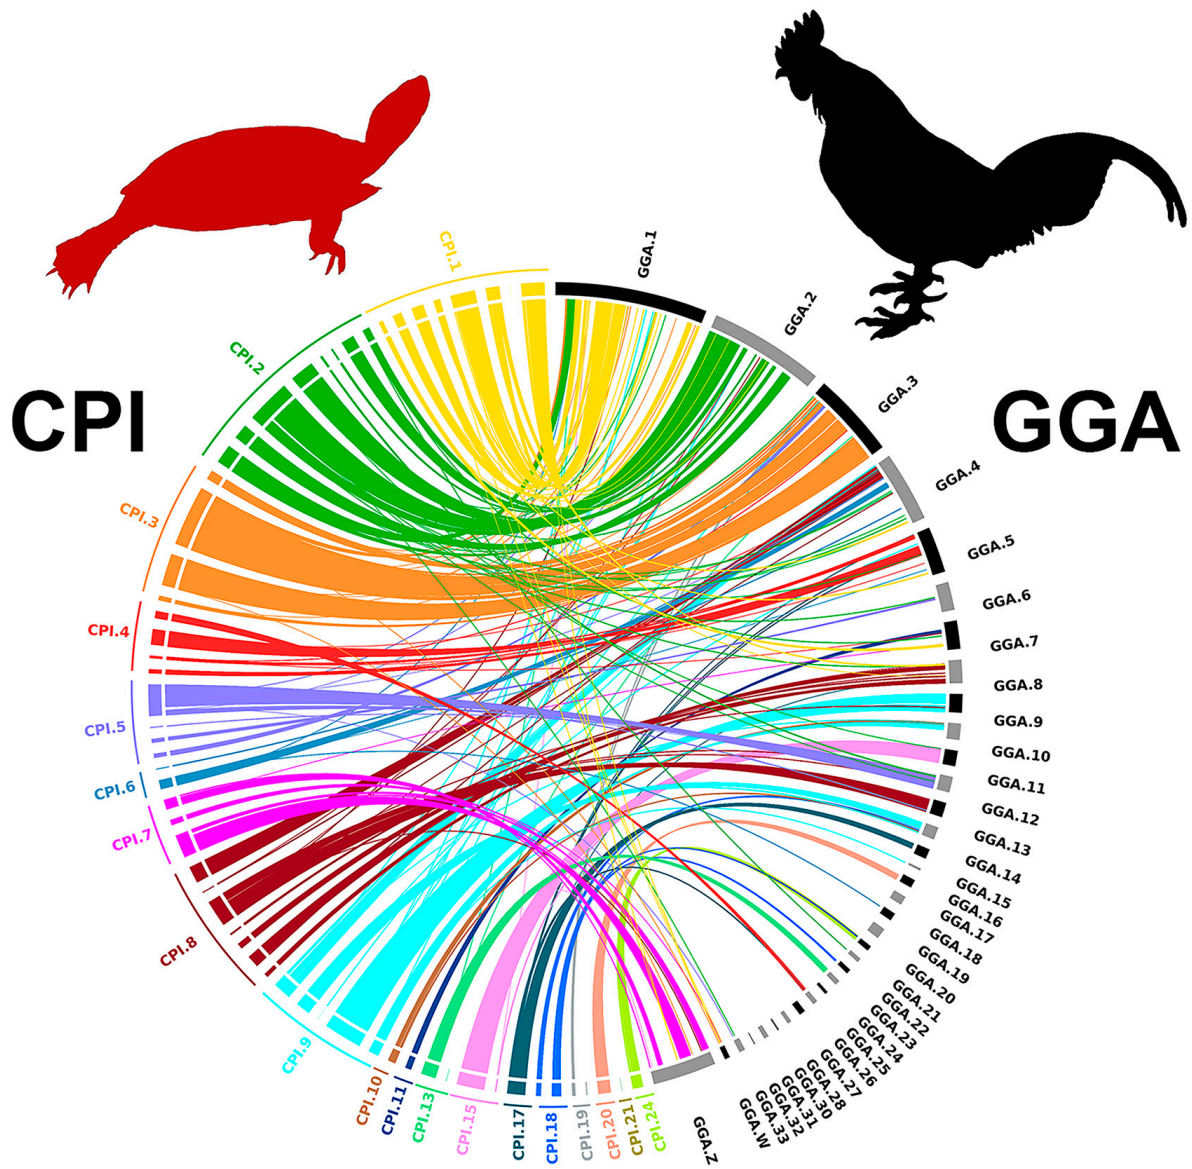

Figure S2.E

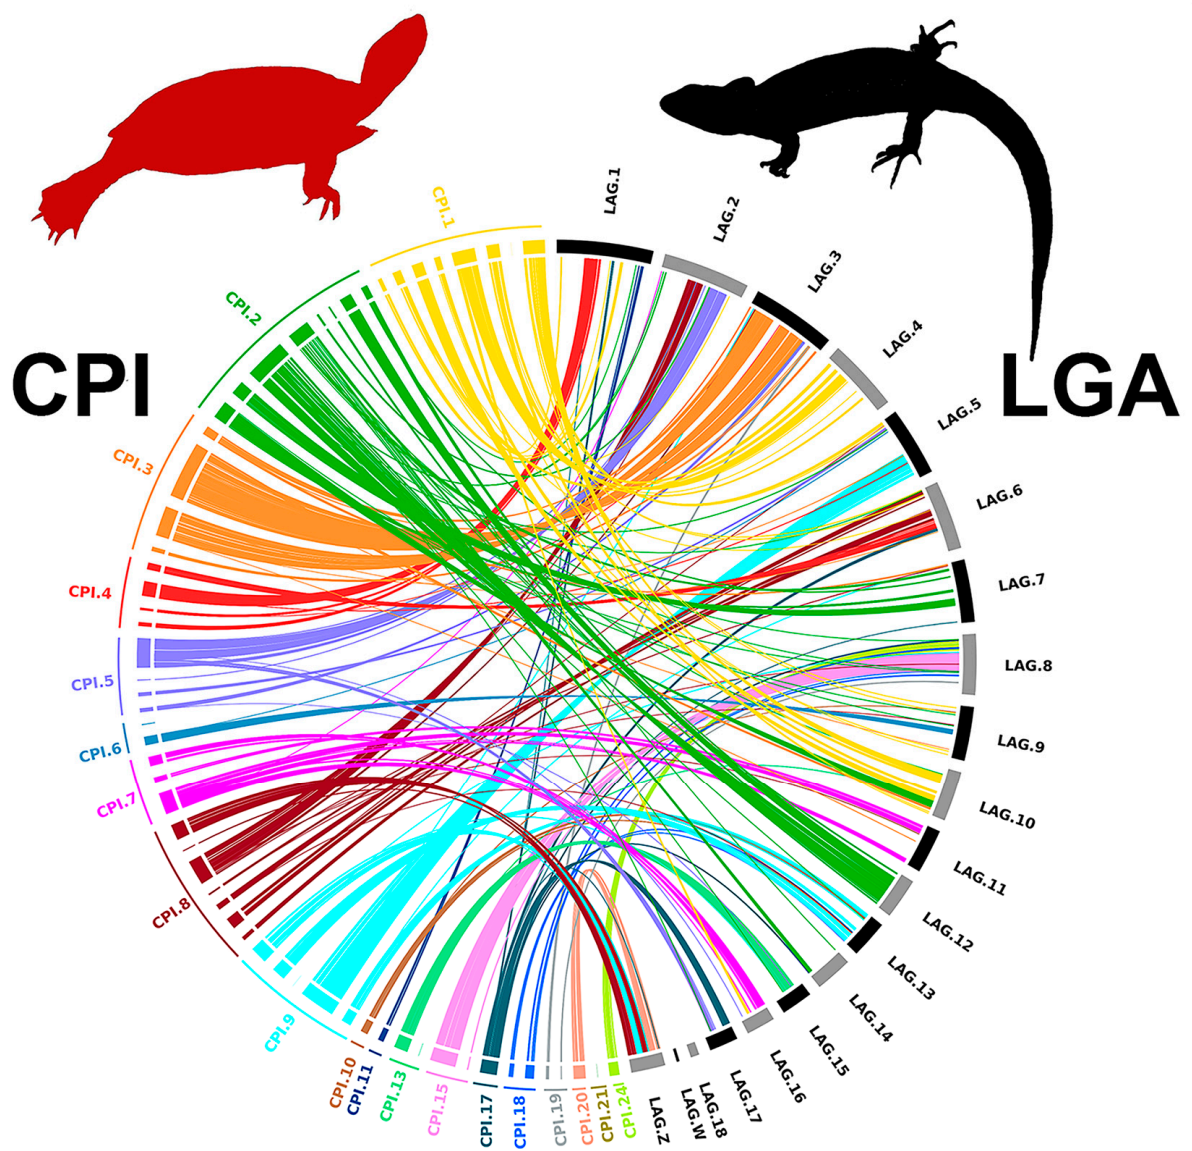



Figure S2.F

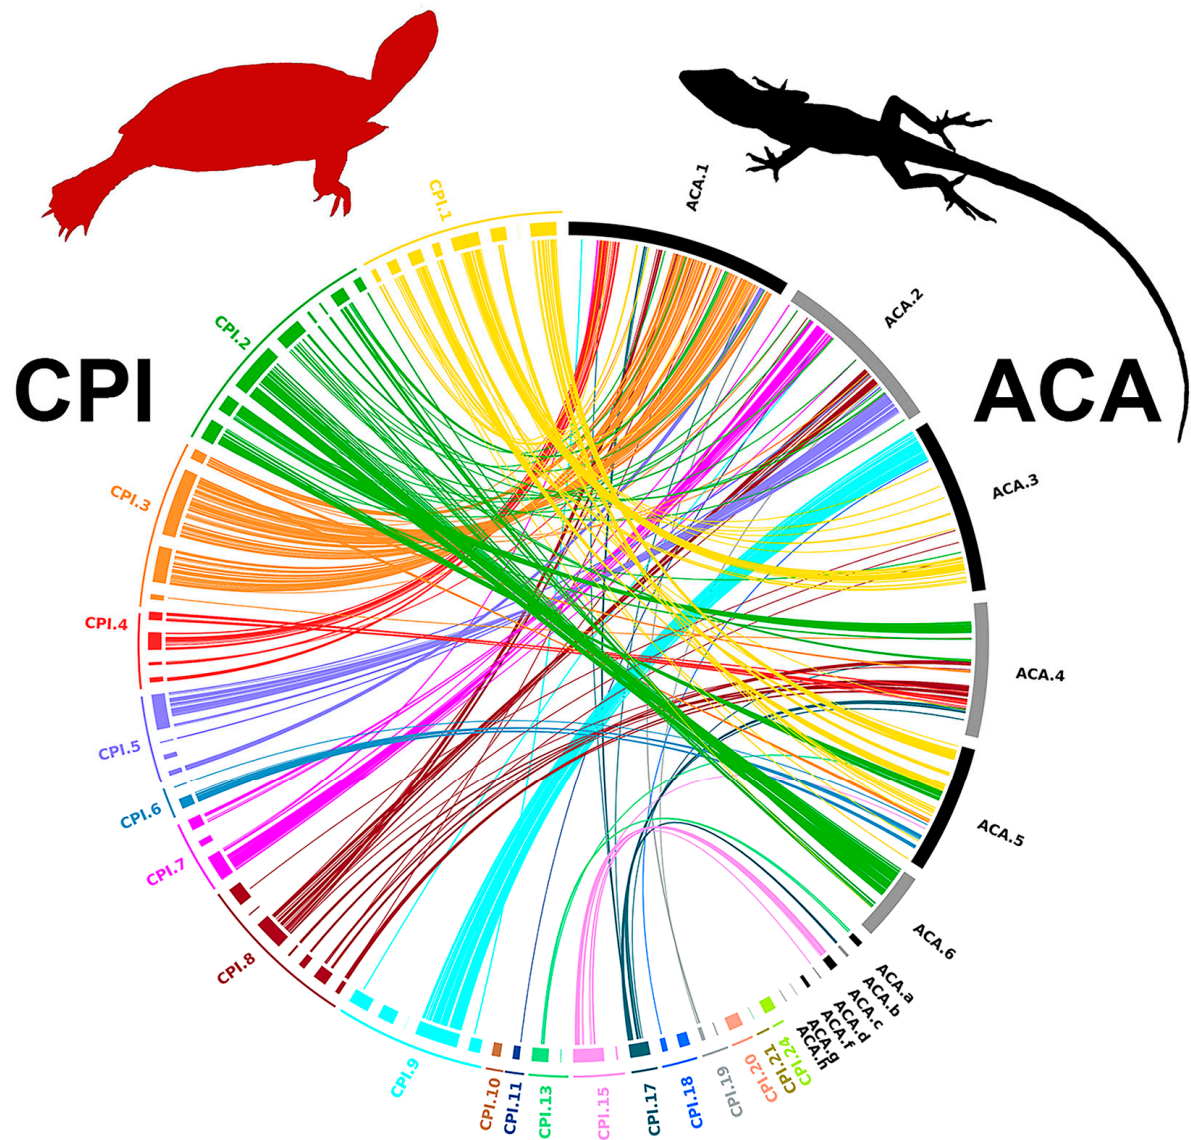



Figure S2.G

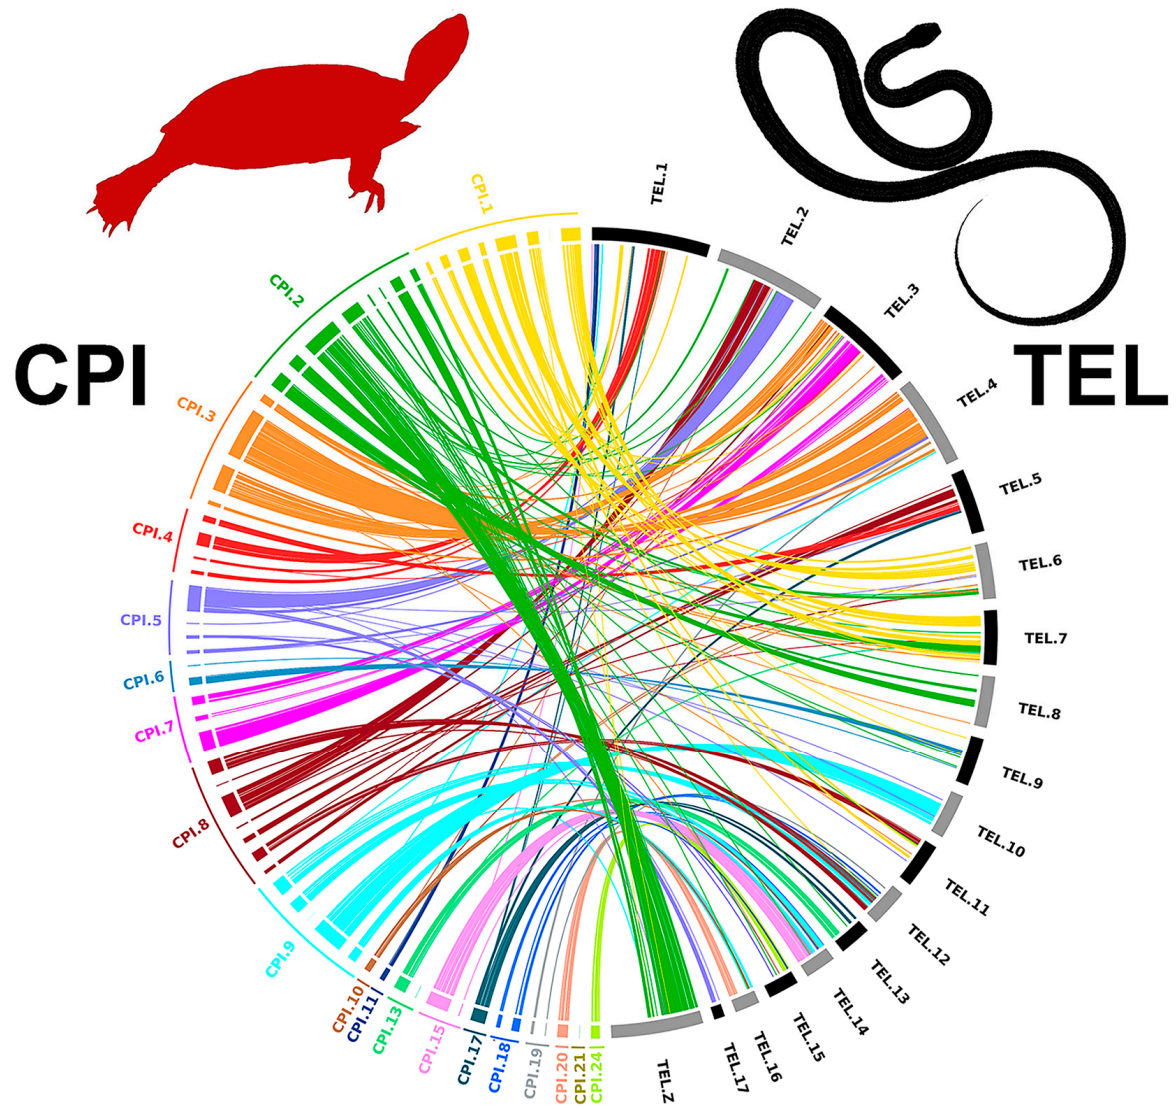

**Table S1.** BACs previously mapped to CPI 3.0.3 [7, 26] and the corresponding hybrid scaffold that contains their sequence in the improved BioNano assembly (CPI 3.0.4). Gray boxes denote CPI 3.0.4 hybrid scaffolds whose size is smaller than the size of the scaffold containing their sequence in CPI 3.0.3 as they were broken during hybrid scaffolding to correct previous assembly errors.

| BAC ID | BAC size | ID CPI_3.0.3 scaffold    | Scaffold size (bp) |            | ID BioNano scaffold | ID NCBI scaffold | CPI chromosome |
|--------|----------|--------------------------|--------------------|------------|---------------------|------------------|----------------|
|        |          |                          | CPI_3.0.3          | BioNano    |                     |                  |                |
| 3H12   | 143,940  | S-80053                  | 4,263,062          | 34,819,878 | 1                   | ML621247.1       | 8p             |
| 380M2  | 127,707  | NW_007359912.1           | 15,526,681         | 49,409,948 | 4                   | ML621250.1       | 9q             |
| 39B2   | 132,109  | S-82                     | 3,917,643          | 5,428,138  | 10                  | ML621256.1       | 5p             |
| 45D19  | 96,874   | S-82                     | 3,917,643          | 5,428,138  | 10                  | ML621256.1       | 5p             |
| 39D13  | 137,437  | S-82                     | 3,917,643          | 5,428,138  | 10                  | ML621256.1       | 5p             |
| 15H12  | 146,961  | S-80051                  | 2,634,650          | 59,628,869 | 15                  | ML621261.1       | 5q             |
| 72H12  | 135,702  | S-80080                  | 5,757,916          | 59,628,869 | 15                  | ML621261.1       | 6              |
| 35H18  | 95,647   | S-80080                  | 5,757,916          | 59,628,869 | 15                  | ML621261.1       | 6              |
| 68H12  | 154,513  | S-80061<br>(NC_024218.1) | 9,425,777          | 17,737,988 | 29                  | ML621275.1       | 1p             |
| 96H12  | 149,167  | S-80083                  | 3,858,447          | 24,527,184 | 31                  | ML621277.1       | 2q             |
| 105H12 | 127,376  | S-95<br>(NC_024225.1)    | 5,576,984          | 7,768,094  | 34                  | ML621280.1       | 8q             |
| 6L20   | 67,532   | N/A                      | N/A                | 30,376,776 | 49                  | ML621294.1       | 1p             |
| 113H12 | 149,332  | S-80008                  | 1,517,931          | 11,934,036 | 51                  | ML621296.1       | 1q             |
| 31H12  | 153,849  | S-106                    | 2,010,786          | 41,666,091 | 53                  | ML621298.1       | 3q             |
| 114H12 | 157,226  | S-388                    | 1,452,383          | 40,936,614 | 59                  | ML621304.1       | 5p             |
| 60H12  | 141,615  | S-321                    | 2,112,785          | 40,936,614 | 59                  | ML621304.1       | 5p             |
| 106H12 | 136,212  | S-80081                  | 4,385,891          | 21,088,589 | 60                  | ML621305.1       | 4q             |
| 53H12  | 168,919  | S-181                    | 3,742,355          | 78,713,847 | 65                  | ML621310.1       | 3q             |
| 82H12  | 140,041  | S-80080a                 | 15,976,761         | 78,713,847 | 65                  | ML621310.1       | 3q             |
| 86H12  | 138,089  | S-80080a                 | 15,976,761         | 78,713,847 | 65                  | ML621310.1       | 3q             |
| 104H12 | 147,332  | S-80006<br>(NC_024220.1) | 6,100,654          | 78,713,847 | 65                  | ML621310.1       | 3q             |
| 337P6  | 147,504  | S-2                      | 13,685,567         | 78,713,847 | 65                  | ML621310.1       | 3q             |
| 4H12   | 165,861  | S-130                    | 4,616,831          | 19,294,758 | 66                  | ML621311.1       | 2q             |
| 147L13 | 159,673  | S-87                     | 2,655,033          | 11,495,585 | 70                  | ML621314.1       | 1q             |
| 27H12  | 145,155  | S-80033                  | 1,096,068          | 11,495,585 | 70                  | ML621314.1       | 11q            |
| 66P24  | 150,786  | NW_007281439.1           | 3,203,753          | 16,617,724 | 83                  | ML621327.1       | 20             |
| 225M10 | 167,779  | NW_007281439.1           | 3,203,753          | 16,617,724 | 83                  | ML621327.1       | 20             |
| 89H12  | 154,187  | S-80073                  | 2,612,954          | 23,487,058 | 92                  | ML621334.1       | 9p             |
| 78H12  | 157,434  | S-58<br>(NC_024225.1)    | 7,585,229          | 23,487,058 | 92                  | ML621334.1       | 9p             |

| BAC ID | BAC size | ID CPI_3.0.3 scaffold    | Scaffold size (bp) |            | ID BioNano scaffold | ID NCBI scaffold | CPI chromosome |
|--------|----------|--------------------------|--------------------|------------|---------------------|------------------|----------------|
|        |          |                          | CPI_3.0.3          | BioNano    |                     |                  |                |
| 6H12   | 126,741  | S-80086                  | 2,492,109          | 20,345,802 | 97                  | ML621338.1       | 4q             |
| 36H12  | 128,113  | S-80086                  | 2,934,610          | 20,345,802 | 97                  | ML621338.1       | 4q             |
| 94H12  | 137,485  | S-465                    | 449,020            | 9,592,646  | 98                  | ML621339.1       | 4q             |
| 85H12  | 156,587  | S-337                    | 1,885,112          | 9,592,646  | 98                  | ML621339.1       | 4q             |
| 29H12  | 148,255  | S-80037                  | 883,801            | 10,078,292 | 122                 | ML621358.1       | 10q            |
| 41L5   | 130,991  | Chr7                     | 19,505,620         | 30,380,950 | 128                 | ML621363.1       | 7              |
| 44L23  | 136,728  | Chr7                     | 19,505,620         | 30,380,950 | 128                 | ML621363.1       | 7              |
| 225G19 | 148,141  | NW_007281425.1           | 4,030,082          | 6,111,058  | 135                 | ML621369.1       | 3q             |
| 125H12 | 136,082  | S-80062                  | 9,826,346          | 12,053,285 | 148                 | ML621381.1       | 3p             |
| 118H12 | 155,821  | S-80023                  | 15,059,908         | 35,860,663 | 150                 | ML621383.1       | 15             |
| 116H12 | 164,317  | S-403                    | 974,180            | 8,440,838  | 153                 | ML621386.1       | 22             |
| 38H12  | 123,368  | S-305<br>(NC_024225.1)   | 2,408,516          | 21,409,697 | 163                 | ML621393.1       | 8q             |
| 63H12  | 160,833  | S-182<br>(NC_024221.1)   | 3,380,903          | 40,323,178 | 178                 | ML621404.1       | 4q             |
| 12H12  | 146,874  | S-206                    | 3,506,855          | 4,552,507  | 187                 | ML621409.1       | 19             |
| 121H12 | 172,646  | S-54                     | 7,609,985          | 12,227,222 | 198                 | ML621416.1       | 18             |
| 45H12  | 139,830  | S-80007                  | 3,922,887          | 27,887,944 | 207                 | ML621424.1       | 1q             |
| 55A6   | 96,865   | Chr1                     | 2,710,524          | 27,887,944 | 207                 | ML621424.1       | 1q             |
| 26H12  | 176,719  | S-80007                  | 9,583,741          | 27,887,944 | 207                 | ML621424.1       | 13             |
| 28H12  | 114,609  | S-17                     | 11,782,114         | 13,725,901 | 263                 | ML621457.1       | 24             |
| 122H12 | 149,052  | S-80054                  | 5,457,888          | 7,275,584  | 271                 | ML621461.1       | 7              |
| 7H12   | 154,039  | N/A                      | N/A                | 32,222,740 | 289                 | ML621472.1       | 1p             |
| 34H12  | 148,967  | NC_024218.1              | 6,492,029          | 12,053,285 | 289                 | ML621472.1       | 1p             |
| 67H12  | 136,737  | NW_007359887.1           | 17,655,681         | 32,222,740 | 289                 | ML621472.1       | 1p             |
| 61H12  | 154,674  | S-80079<br>(NC_024218.1) | 2,187,388          | 32,222,740 | 289                 | ML621472.1       | 1q             |
| 14H12  | 140,369  | S-126                    | 4,729,526          | 2,238,381  | 313                 | ML621487.1       | 2p             |
| 88H12  | 133,525  | S-20                     | 11,526,792         | 3,590,187  | 330                 | ML621494.1       | 4q             |
| 120H12 | 143,115  | S-78603                  | 3,096,457          | 11,971,961 | 333                 | ML621496.1       | 6              |
| 54H12  | 150,777  | S-189<br>(NC_024225.1)   | 3,750,446          | 16,028,813 | 336                 | ML621499.1       | 8q             |
| 40H12  | 129,188  | S-37                     | 9,167,197          | 16,028,813 | 336                 | ML621499.1       | 8q             |
| 99H12  | 161,189  | S-80091                  | 10,614,869         | 16,944,102 | 337                 | ML621500.1       | 2p             |
| 33H12  | 148,059  | S-473                    | 1,134,339          | 1,132,839  | 338                 | ML621501.1       | 6              |
| 5H12   | 142,022  | S-39                     | 9,099,247          | 9,299,624  | 339                 | ML621502.1       | 2p             |

| BAC ID | BAC size | ID CPI_3.0.3 scaffold | Scaffold size (bp) |           | ID BioNano scaffold | ID NCBI scaffold | CPI chromosome |
|--------|----------|-----------------------|--------------------|-----------|---------------------|------------------|----------------|
|        |          |                       | CPI_3.0.3          | BioNano   |                     |                  |                |
| 25H12  | 150,927  | S-51                  | 6,467,922          | 9,299,624 | 339                 | ML621502.1       | 2p             |
| 123H12 | 141,288  | S-80038               | 2,164,901          | 2,502,062 | 341                 | ML621504.1       | 8q             |
| 52H12  | 170,696  | S-681                 | 214,052            | 1,374,423 | CM002669.1_obj_obj  | ML625050.1       | 21             |



**Table S2:** Number of genes sequences mapped bioinformatically (*in silico*) to BioNano assembly (CPI 3.0.4) and physically anchored to *C. picta* chromosomes via FISH of some of those BACs in Badenhorst et al. (2015) and Lee et al. (2019) or present study (grey box). Yellow boxes denote discrepancies noted between present and previous studies.

| ID BioNano scaffold | ID NCBI scaffold | BioNano scaffold size (bp) | CPI chromosome | Number of genes |
|---------------------|------------------|----------------------------|----------------|-----------------|
| 1                   | ML621247.1       | 34,819,878                 | 8p             | 200             |
| 4                   | ML621250.1       | 49,409,948                 | 9q             | 253             |
| 10                  | ML621256.1       | 5,428,138                  | 5p             | 34              |
| 14                  | ML621260.1       | 13,251,999                 | 9q             | 56              |
| 15                  | ML621261.1       | 59,628,869                 | 5q             | 208             |
| 18                  | ML621264.1       | 1,390,666                  | 8p             | 16              |
| 23                  | ML621269.1       | 31,217,720                 | 2p             | 81              |
| 29                  | ML621275.1       | 17,737,988                 | 1p             | 71              |
| 31                  | ML621277.1       | 24,527,184                 | 2q             | 79              |
| 34                  | ML621280.1       | 7,768,094                  | 8q             | 37              |
| 49                  | ML621294.1       | 30,376,776                 | 1p             | 118             |
| 51                  | ML621296.1       | 11,934,036                 | 1q             | 40              |
| 53                  | ML621298.1       | 41,666,091                 | 3q             | 132             |
| 56                  | ML621301.1       | 6,383,505                  | 18             | 26              |
| 59                  | ML621304.1       | 40,936,614                 | 5p             | 300             |
| 60                  | ML621305.1       | 21,088,589                 | 4q             | 132             |
| 65                  | ML621310.1       | 78,713,847                 | 3q             | 371             |
| 66                  | ML621311.1       | 19,294,758                 | 2q             | 89              |
| 70                  | ML621314.1       | 11,495,585                 | 1q             | 24              |
| 75                  | ML621319.1       | 13,166,690                 | 7              | 49              |
| 76                  | ML621320.1       | 21,927,555                 | 8p             | 110             |
| 83                  | ML621327.1       | 16,617,724                 | 20             | 161             |
| 87                  | ML621330.1       | 5,648,650                  | 5q             | 17              |
| 92                  | ML621334.1       | 23,487,058                 | 9p             | 89              |
| 97                  | ML621338.1       | 20,345,802                 | 4q             | 119             |
| 98                  | ML621339.1       | 9,592,646                  | 4q             | 95              |
| 120                 | ML621356.1       | 1,852,121                  | 15             | 16              |
| 122                 | ML621358.1       | 10,078,292                 | 10q            | 38              |
| 126                 | ML621362.1       | 19,176,785                 | 13             | 144             |
| 128                 | ML621363.1       | 30,380,950                 | 7              | 126             |
| 135                 | ML621369.1       | 6,111,058                  | 3q             | 21              |
| 141                 | ML621375.1       | 5,625,148                  | 4q             | 63              |
| 145                 | ML621378.1       | 23,325,489                 | 17             | 200             |

| ID BioNano scaffold | ID NCBI scaffold | BioNano scaffold size (bp) | CPI chromosome | Number of genes |
|---------------------|------------------|----------------------------|----------------|-----------------|
| 148                 | ML621381.1       | 12,053,285                 | 1p             | 57              |
| 150                 | ML621383.1       | 35,860,663                 | 15             | 200             |
| 153                 | ML621386.1       | 8,440,838                  | 22             | 33              |
| 163                 | ML621393.1       | 21,409,697                 | 8q             | 110             |
| 177                 | ML621403.1       | 1,209,793                  | 19             | 7               |
| 178                 | ML621404.1       | 40,323,178                 | 4q             | 164             |
| 179                 | ML621405.1       | 57,448,544                 | 2p             | 220             |
| 187                 | ML621409.1       | 4,552,507                  | 19             | 25              |
| 194                 | ML621413.1       | 18,639,614                 | 9p             | 194             |
| 198                 | ML621416.1       | 12,227,222                 | 18             | 85              |
| 203                 | ML621420.1       | 15,883,268                 | 1p             | 55              |
| 207                 | ML621424.1       | 27,887,944                 | 1q             | 155             |
| 217                 | ML621429.1       | 8,721,052                  | 1p             | 47              |
| 263                 | ML621457.1       | 13,725,901                 | 24             | 112             |
| 271                 | ML621461.1       | 7,275,584                  | 7              | 10              |
| 289                 | ML621472.1       | 32,222,740                 | 1p             | 177             |
| 304                 | ML621480.1       | 3,056,537                  | 2p             | 4               |
| 309                 | ML621483.1       | 5,421,227                  | 8q             | 51              |
| 313                 | ML621487.1       | 2,238,381                  | 2p             | 9               |
| 330                 | ML621494.1       | 3,590,187                  | 4q             | 15              |
| 331                 | ML621495.1       | 5,731,011                  | 1q             | 22              |
| 333                 | ML621496.1       | 11,971,961                 | 6              | 41              |
| 336                 | ML621499.1       | 16,028,813                 | 8q             | 69              |
| 337                 | ML621500.1       | 16,944,102                 | 2p             | 91              |
| 338                 | ML621501.1       | 1,132,839                  | 6              | 6               |
| 339                 | ML621502.1       | 9,299,624                  | 2p             | 52              |
| 341                 | ML621504.1       | 2,502,062                  | 8q             | 9               |
| 29527               | ML621534.1       | 1,293,745                  | 5p             | 9               |
| CM002669.1_obj_obj  | ML625050.1       | 1,374,423                  | 21             | N/A             |

### Supplementary Script 1: Custom R script for BAC mapping to genome scaffolds.

```
library(tidyverse)
a=read.table("list.txt", header = F, stringsAsFactors = F) #list.txt is a list of filenames i.e.
individual fasta files each containing a bac sequence in a folder named seq
seqkit="/seqkit" $ location to the seqkit binary
for (i in a$V1){
  system(paste0("cat seq/",i, ".seqkit," sliding -s 50 -W 150 > ", i )) # extracting 150bp
wide windows from a sequence at a step of 50bps.
  system(paste0("head -n 1 seq/",i, ">> Results.txt "))
  system(paste0("bwa mem CPI_genome.fa ", i, "> ",i,".sam"))# mapping the windows to
the genome using bwa, to change genome make sure the genome is indexed for bwa and
create fai file for the genome in samtools
  system(paste0("samtools view -@ 16 -bS -t CPI_genome.fa.fai ", i,".sam | samtools sort -
@ 16 > ",i,".bam"))
  system(paste0("samtools index ",i,".bam"))
  system(paste0("samtools view -h -o ", i, ".sort.sam ",i,".bam"))
  system(paste0("mv ",i,".sort.sam sam/"))
  system(paste0("samtools idxstats ",i,".bam |", "sort -r -n -k 3,3 | head -n 5>> Results.txt"))
  system(paste0("rm -f ", i,"*" ))
}

dat=data.frame(BACS=character(),Scaffold=character(),min=numeric(), max=numeric())
system("cd sam && ls *.sam>lst")
lst=read.table("lst", header = F) # lst is a file with the names of the sam files placed in the
sam directory in the previous loop

for (k in lst$V1){ ###obtains the position of the blocks in the scaffold where most of the
windows map to in a scaffold/contig from a sam file.
  sam=read.delim(paste0("sam/",k), comment.char = "@", header = F)
  a=table(sam$V3)
  sam<-sam %>% filter(V3==names(a[a==max(table(sam$V3))])) %>% arrange(V4)

  sam$T=0

  counter=0
```

```

for (i in 1:nrow(sam)){
  if (i==1){
    counter=1
    sam$T[i]=1
  } else {
    if (sam$V4[i]-sam$V4[i-1]< 25000){
      sam$T[i]=counter
    } else{
      counter=counter+1
      sam$T[i]=counter
    }
  }
}
b=table(sam$T)
b
sam<-sam %>% select(V1,V2,V3,V4,T)
b=sort(b,decreasing = T)
s=as.numeric(names(b[1:3]))
names(b[b==max(table(sam$T))])

ss=sam %>% filter(T %in% s)
sss <- ss %>% group_by(T )%>% mutate(BAC=word(V1, sep="_"),max=max(V4),
min=min(V4)) %>% ungroup()%>% select(BAC, TSC=V3, min, max) %>% distinct()
dat=rbind(dat,sss)
}

dat$len=dat$max-dat$min

write.csv(dat, "Bac_mapping_position.csv") # Output is a list of mapping blocks where
windows from a particular BAC maps.

```
